# Supplementary material
Source: Springer Nature journal article supplement (https://www.springermedizin.de/resource/supplementary/12889_2009_3035_MOESM4_ESM.pdf/9487894)

**EE**

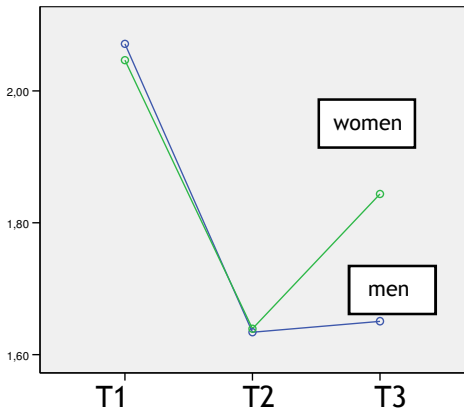

**DEP**

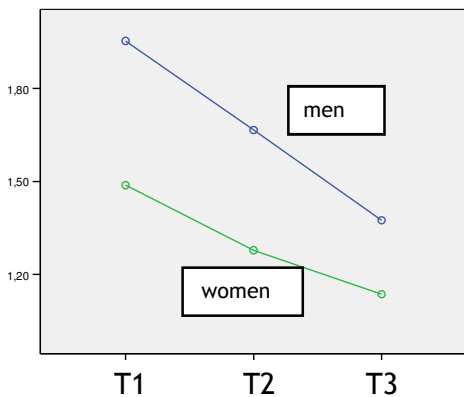

**PA**

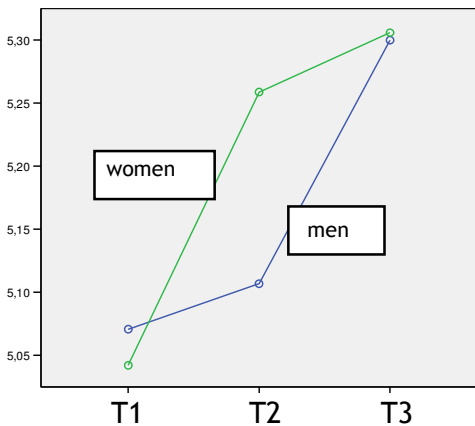

Supplement: MOESM4 [file 9487894]
